# Supplementary material
Source: HighWire-hosted journal article supplement (https://www.cmaj.ca/highwire/filestream/58493/field_highwire_adjunct_files/0/analysissep26-online_appendix_1.pdf)
Supplement: analysissep26-online_appendix_1.pdf [file analysissep26-online_appendix_1.pdf]

**Appendix 1: Worldwide prevalence and impact of diabetes in 2003 and predictions for 2025**

| Region                          | No. of people,*<br>thousands |         | Prevalence,* % |      | Direct medical costs in 2003,*<br>in millions of 2002 US\$ |               | Deaths in<br>2001,‡<br>thousands | Disability-<br>adjusted life-<br>years in 2001,†<br>thousands |
|---------------------------------|------------------------------|---------|----------------|------|------------------------------------------------------------|---------------|----------------------------------|---------------------------------------------------------------|
|                                 | 2003                         | 2025    | 2003           | 2025 | Low estimate                                               | High estimate |                                  |                                                               |
| Developing countries            | 140 849                      | 264 405 | 4.5            | 5.9  | 12 304                                                     | 23 127        | 757                              | 15 804                                                        |
| East Asia and the Pacific       | 31 363                       | 60 762  | 2.6            | 3.9  | 1 368                                                      | 2 656         | 234                              | 4 930                                                         |
| Europe and Central Asia         | 25 764                       | 33 141  | 7.6            | 9.0  | 2 884                                                      | 5 336         | 51                               | 1 375                                                         |
| Latin America and the Caribbean | 19 026                       | 36 064  | 6.0            | 7.8  | 4 592                                                      | 8 676         | 163                              | 2 775                                                         |
| Middle East and North Africa    | 10 792                       | 23 391  | 6.4            | 7.9  | 2 347                                                      | 4 340         | 31                               | 843                                                           |
| South Asia                      | 46 309                       | 94 848  | 5.9            | 7.7  | 840                                                        | 1 589         | 196                              | 4 433                                                         |
| Sub-Saharan Africa              | 7 595                        | 16 199  | 2.4            | 2.8  | 273                                                        | 530           | 82                               | 1 448                                                         |
| Developed countries             | 53 337                       | 68 345  | 7.8            | 9.2  | 116 365                                                    | 217 760       | 202                              | 4 192                                                         |
| World                           | 194 186                      | 332 748 | 5.1            | 6.3  | 128 669                                                    | 240 887       | 959                              | 19 996                                                        |

\*Source: *Diabetes atlas*. 2nd ed. Brussels: International Diabetes Federation; 2003.

†Source: World Health Organization. *Global burden of disease for the year 2001 by World Bank region, for use in disease control priorities in developing countries*. 2nd ed. Geneva: World Health Organization; 2002.

‡For people 20-79 years of age.
